# Supplementary material for: Asymmetric electrowetting—moving droplets by a square wave
Source: Royal Society of Chemistry journal article supplement (doi:10.1039/b704084a), 2007-01-01
Supplement: b704084a.pdf [file b704084a.pdf]

## **Electronic Supplementary Information for**

### **Asymmetric Electrowetting - Moving Droplets by a Square Wave**

Hanping Yang,<sup>a</sup> Tsu-Te Wang,<sup>b</sup> Wensyang Hsu<sup>a</sup> and Shih-Kang Fan<sup>\*b</sup>

<sup>a</sup>Department of Mechanical Engineering, <sup>b</sup>Institute of Nanotechnology,  
National Chiao Tung University, Hsinchu, Taiwan

\*Correspondent: Shih-Kang Fan

139R, Engineering Building 5,  
1001 Ta Hsueh Road, Hsinchu, Taiwan  
(Tel) 886-3-5712121ext55813, (Fax) 886-3-5729912  
(E-mail) skfan@mail.nctu.edu.tw

**This supplementary information including:**

1. Video 1

This video corresponds to the images in Fig. 5(a). A 40 V<sub>p</sub> and 1 Hz square wave was applied on the asymmetric electrodes. Due to the asymmetric electrowetting start to occur, droplet oscillated slightly between two electrodes.

2. Video 2

When voltage was increased to 90 V<sub>p</sub>, the droplet was suffered from a sufficient contact angle difference caused by asymmetric electrowetting, and then started to be pumped continuously.

3. Video 3

At 140 V<sub>p</sub>, the asymmetric electrowetting entered the saturation region. The droplet motions of expansion and contraction occurred mostly, and droplet jump was observed sometimes.

4. Video 4

This video corresponds to the images in Fig. 4(b). By applying higher frequency of square wave (~ 9Hz), the droplet would speed up to catch up the electric signal. As a result, the velocity of droplet can be up to 23.6 mm/s.

5. Fig. S1

Sessile drop experiment for electrowetting study.

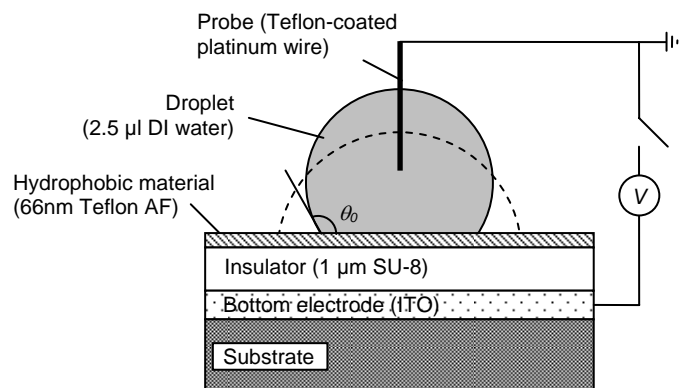

Fig. S1 Sessile drop experiment for electrowetting study.
